# Supplementary material for: Classification of crystal structures of thiophene-containing organic semiconductors
Source: Royal Society of Chemistry journal article supplement (doi:10.1039/d3ce00893b), 2023-01-01
Supplement: d3ce00893b1.pdf [file d3ce00893b1.pdf]

## Supporting Information

# Classification of crystal structures of thiophene-containing organic semiconductors

*Takehiko Mori*

Department of Materials Science and Engineering, Tokyo Institute of Technology, O-

okayama 2-12-1, Meguro-ku, Tokyo 152-8552, Japan. E-mail: [mori.t@mac.titech.ac.jp](mailto:mori.t@mac.titech.ac.jp)

### Parameters of intermolecular interaction

The intermolecular energy was estimated according to the standard 6-exp potential,<sup>S1-S8</sup>

$$V = \varepsilon \left[ A \exp\left(-B \frac{r}{r_0}\right) - C \left(\frac{r_0}{r}\right)^6 \right] + D \rho_i \rho_j / r_0 \quad (\text{S1})$$

where  $A = 184000$ ,  $B = 12$ ,  $C = 2.25$ , and  $D = 1380 \text{ kJ } \text{\AA} \text{ mol}^{-1}$ .<sup>S9</sup> The parameters were taken from the MM3 force field (Table S1).<sup>7,29,S10</sup> The dispersion represented by this equation has a minimum of  $1.12\varepsilon$  at  $r_0$ . For interaction between different atoms, the geometrical average was used for  $\varepsilon$ , while the arithmetic average was used for  $r_0$ . There were no reliable parameters for Se, but the values that gave slightly larger potentials than S were used. To this dispersion energy, electrostatic energy coming from the last term was added.<sup>S3-S5,S8</sup> Charges  $\rho_i$  calculated from the molecular orbitals scattered largely,<sup>7</sup> and significantly depended on the estimation methods, hence the same charge was allotted to the same kind of atoms (Table S1). The opposite charge was allotted to the connecting carbon atoms so as to maintain the charge neutrality (Fig. S1(b)). Charges on N and S were either positive or negative depending on the environments, so the average values were adopted. The results reproduced the reported charges well.<sup>7</sup> Usually, electrostatic energy between various atoms canceled each other, and the total electrostatic contribution was 5-6% of the total intermolecular energy (Fig. S12-S15).

**Table S1** Force-field parameters<sup>S11</sup>

| Atom | $\varepsilon$ (kJ mol <sup>-1</sup> ) | $r_0$ (Å) | Charge $\rho_i$ |
|------|---------------------------------------|-----------|-----------------|
| C    | 0.2343                                | 3.92      | –               |
| H    | 0.0837                                | 3.24      | 0.115           |
| S    | 0.8452                                | 4.30      | 0.07            |
| O    | 0.2466                                | 3.64      | -0.30           |
| N    | 0.1797                                | 3.86      | 0.00            |
| Se   | 1.8                                   | 4.30      | 0.07            |

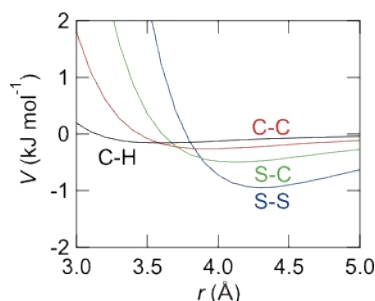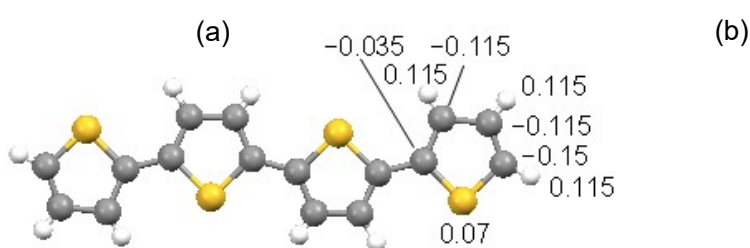

**Fig. S1** (a) Potential curves based on eq (S1) and Table S1. (b) Charges on 4T.

$W$  and  $L$  are related to  $m$  in fused molecules (Fig. S2).

$$W = 1.66 + 2.46m \quad (\text{S2})$$

However,  $W$  of acenes, typically 4.8 Å is slightly larger than those of  $n$ P (4.2 Å, Table 1), and those of fused TTT molecules ( $< 4.0$  Å, Table 2) are slightly smaller than those of the ordinary HB molecules (Table 1). Molecules including an odd number of thiophene rings have a V-shape, and the entries after PPTPP in Table 1 have large  $W > 5.3$  Å.<sup>69-76</sup> Despite the large  $W$ , all these one-leg molecules have HB structures, but tend to have small  $\theta$  around  $40^\circ$  in order to adjust the large  $W$  to the HB structure.

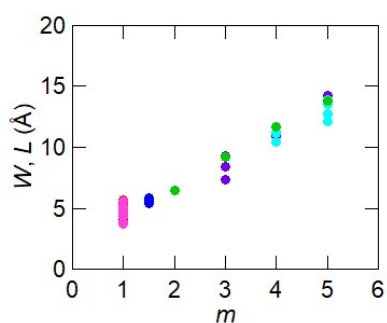

**Fig. S2**  $W$  and  $L$  as a function of the leg number  $m$ .

### Other structure parameters of HB structures

Coordinates ( $X_g'$ ,  $Y_g'$ ,  $Z_g'$ ) of the center of the bottom molecule represented by the molecular coordinates of the top molecule (Fig. 1(a)) are listed in Table S2 and S3. Similar to eqn 4,  $Y_g'$  and  $Z_g'$  are evaluated from  $a$ ,  $b$ , and  $\theta$ .

$$Y_g' = \frac{a}{2} \sin \frac{\theta}{2} + \frac{b}{2} \cos \frac{\theta}{2}$$

$$Z_g' = \frac{a}{2} \cos \frac{\theta}{2} - \frac{b}{2} \sin \frac{\theta}{2} \quad (S3)$$

In analogy with Fig. 4(b), these relations reproduce the actual values taken from Table S2 and S3 satisfactorily (Fig. S3).

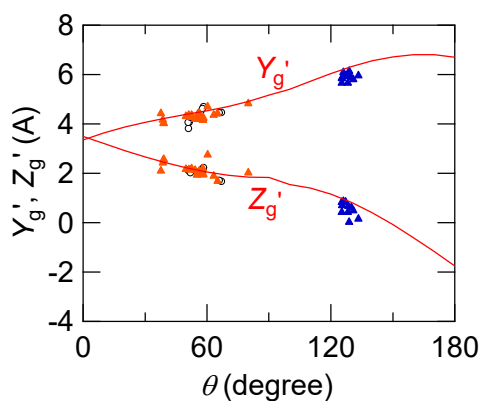

**Fig. S3**  $Y_g'$  and  $Z_g'$  as a function of  $\theta$  estimated from eqn (S3).

When molecular coordinates of respective atoms of the bottom molecule ( $X$ ,  $Y$ ,  $Z$ ) are given, coordinates of the top molecule are obtained.

$$X' = -X + X_g$$

$$Y' = Y \cos \theta + Z \sin \theta + Y_g$$

$$Z' = Y \sin \theta - Z \cos \theta + Z_g \quad (S4)$$

In thiophene-containing V-shaped molecules, the  $g$  molecule is generated by a screw axis instead of a glide plane. In such a case, the sign of  $Y'$  is inverted.

**Table S2** Supplementary structure parameters of representative HB structures

| Compound            | $L$ (Å) | $X_g$ (Å) | $Y_g$ (Å) | $Z_g$ (Å) | $V_g$ (kJ mol <sup>-1</sup> ) | $V_X$ (kJ mol <sup>-1</sup> ) | CCDC    |    |
|---------------------|---------|-----------|-----------|-----------|-------------------------------|-------------------------------|---------|----|
| naphthalene         | 6.45    | 2.52      | 3.82      | 2.12      | -15.76                        | -5.56/-4.12                   | 1216814 | 30 |
| anthracene          | 9.16    | 2.49      | 4.07      | 2.14      | -23.16                        | -6.50/-3.62                   | 1103062 | 31 |
| tetracene*          | 11.67   | 2.02      | 4.20      | 2.17      | -31.76                        | -4.39/-3.87                   | 1502159 | 32 |
| pentacene*          | 13.82   | 2.19      | 4.27      | 2.03      | -39.19                        | -5.67/-2.30                   | 619981  | 33 |
| 2P                  | 9.14    | 1.23      | 4.48      | 1.67      | -20.81                        | -7.18/-3.76                   | 1111363 | 34 |
| 3P                  | 13.50   | 1.21      | 4.47      | 1.68      | -34.38                        | -3.39/-1.03                   | 1269381 | 35 |
| 4P                  | 18.07   | 1.22      | 4.46      | 1.72      | -46.37                        | -7.68/-2.87                   | 1245768 | 36 |
| 4T (high $T$ )      | 15.73   | 2.50      | 4.23      | 2.03      | -38.52                        | -5.98/-4.01                   | 117770  | 37 |
| 6T (high $T$ )      | 23.72   | 2.59      | 4.26      | 2.03      | -62.42                        | -4.65/-3.54                   | 1309241 | 38 |
| 8T                  | 31.58   | 1.20      | 4.37      | 1.90      | -80.17                        | -1.92/-0.84                   | 1269355 | 39 |
| 6O                  | 21.32   | 2.21      | 4.16      | 2.19      | -40.64                        | -8.49/-2.09                   | 750302  | 40 |
| PTP                 | 8.84    | 5.53      | 4.37      | 1.75      | -11.68                        | -3.49/-3.38                   | 257584  | 41 |
|                     | s       | 4.22      | 1.49      | 3.48      | -23.32                        |                               |         |    |
| TPT                 | 8.55    | 0.42      | 4.30      | 2.10      | -21.05                        | -6.83/-1.96                   | 295043  | 42 |
| TPPT <sup>a</sup>   | 11.25   | 1.78      | 4.18      | 2.12      | -30.30                        | -3.00/-2.54                   | 1899660 | 43 |
| TPPPT               | 13.75   | 1.86      | 4.17      | 2.10      | -39.13                        | -7.74/-3.75                   | 944975  | 44 |
| TPPPPT <sup>r</sup> | 13.80   | 1.25      | 4.60      | 2.10      | -43.58                        | -4.06                         | 1544287 | 45 |
| PTPTP               | 13.11   | 5.39      | 4.47      | 1.84      | -26.96                        | -23.00/-5.43                  | 667690  | 46 |
| PTTP (BTBT)         | 10.74   | 0.49      | 4.44      | 2.11      | -26.66                        | -5.90/-4.73                   | 975935  | 47 |
| PPTTPP (DNTP)       | 15.32   | 0.79      | 4.31      | 2.19      | -45.50                        | -5.91/-4.51                   | 644240  | 48 |
| PPPTPPP (DATT)      | 20.15   | 0.41      | 4.31      | 2.17      | -63.67                        | -6.45/-4.95                   | 839976  | 49 |
| P-PTTP-P            | 19.05   | 0.07      | 4.29      | 2.35      | -55.18                        | -4.56                         | 837916  | 50 |
| PSeSeP              | 10.68   | 0.68      | 4.72      | 2.02      | -27.21                        | -3.37/-2.61                   | 607975  | 51 |
| P-PSeSeP-P          | 19.24   | 3.17      | 4.18      | 2.23      | -50.80                        | -7.06/-4.58                   | 607976  | 51 |
| PTTPPTTP            | 19.23   | 0.34      | 4.36      | 2.20      | -54.19                        | -5.30/-5.18                   | 1001008 | 52 |
| P-TPPT-P            | 19.96   | 0.84      | 4.30      | 2.00      | -56.37                        | -6.25/-4.96                   | 837914  | 50 |
| T-TT-T              | 14.04   | 3.04      | 4.17      | 1.86      | -30.68                        | -6.95/-3.91                   | 625219  | 53 |
| TT-TT               | 12.47   | 0.83      | 4.27      | 1.91      | -26.77                        | -4.84/-3.99                   | 625220  | 53 |
| 2P-TT-2P            | 23.66   | 1.24      | 4.43      | 1.69      | -66.09                        | -7.08/-4.11                   | 289196  | 54 |
| PAP                 | 8.85    | 0.23      | 4.55      | 1.60      | -16.15                        | -3.02/-1.30                   | 148755  | 55 |
| PAPP                | 11.48   | 2.12      | 4.12      | 2.03      | -23.93                        | -5.15/-3.83                   | 696054  | 56 |
| PPAPP               | 13.76   | 2.11      | 4.23      | 1.95      | -39.96                        | -6.36/-2.77                   | 220864  | 57 |
| POP                 | 8.63    | 0.00      | 4.47      | 2.01      | -21.78                        | -4.46/-3.87                   | 1137351 | 58 |
| PNP                 | 8.47    | 2.77      | 4.45      | 1.99      | -20.73                        | -5.71/-4.20                   | 1131619 | 59 |
| PNNP                | 10.48   | 1.88      | 4.22      | 1.96      | -20.11                        | -5.31/-3.48                   | 1456637 | 18 |
| P-NPN-P             | 17.09   | 0.99      | 4.17      | 1.95      | -43.35                        | -4.94/-2.89                   | 694651  | 60 |
| PNPPNP              | 14.48   | 1.78      | 4.83      | 2.02      | -29.05                        | -6.20/-4.20                   | 1522122 | 61 |
| phenanthrene        | 9.20    | 1.13      | 4.70      | 2.23      | -17.98                        | -3.15                         | 1232377 | 62 |
| crysene             | 11.28   | 1.45      | 4.49      | 2.05      | -29.80                        | -7.60/-4.74                   | 1483901 | 63 |
| picene              | 13.48   | 1.18      | 4.62      | 2.05      | -36.65                        | -3.19                         | 1319885 | 64 |
| 2P-2T-2P            | 25.28   | 1.01      | 4.36      | 2.02      | -70.45                        | -6.60/-3.99                   | 232983  | 65 |
| 2P-3T-2P            | 28.82   | 1.98      | 4.03      | 2.57      | -79.29                        | -9.08/-3.72                   | 232984  | 66 |
| 2P-4T-2P            | 32.98   | 1.31      | 4.27      | 2.14      | -93.32                        | -3.60/-1.11                   | 232985  | 66 |
| 2T-2P-2T            | 24.17   | 1.72      | 4.17      | 2.43      | -65.46                        | -7.96/-1.69                   | 619631  | 67 |
| P-2O-P              | 15.38   | 0.07      | 4.47      | 2.04      | -35.34                        | -5.83/-4.17                   | 1585923 | 68 |
| PPTPP               | 13.24   | 1.04      | 4.34      | 2.35      | -40.59                        | -4.89                         | 886147  | 69 |
| PPTPP <sup>r</sup>  | 12.61   | 0.00      | 4.56      | 2.31      | -40.58                        | -4.96/-4.27                   | 898433  | 70 |
| PPNPP               | 13.32   | 1.53      | 4.15      | 2.26      | -36.81                        | -6.80/-3.67                   | 1868302 | 71 |
| PPPTPPP             | 17.77   | 1.05      | 4.15      | 2.70      | -58.26                        | -2.93/-1.84                   | 918807  | 72 |
| PPPOPPP             | 17.98   | 0.56      | 4.09      | 2.43      | -57.97                        | -8.29/-2.98                   | 918806  | 72 |
| PTTTP               | 12.68   | 0.00      | 4.58      | 2.04      | -31.64                        | -6.10/-4.76                   | 600120  | 73 |
| P-TTT-P             | 16.44   | 0.04      | 4.04      | 2.54      | -46.76                        | -6.19/-1.84                   | 1005154 | 74 |
| P-TTT-TTT-P         | 27.20   | 0.52      | 4.08      | 2.47      | -71.39                        | -6.06/-5.13                   | 1005153 | 75 |
| P-PTTPPTTP-P        | 27.21   | 0.42      | 4.28      | 2.29      | -82.50                        | -7.04/-4.50                   | 1437639 | 76 |

**Table S3** Supplementary structure parameters of representative  $\theta$ -structures

| Compound     | $m$ | $L$ (Å) | $X_g$ (Å) | $Y_g$ (Å) | $Z_g$ (Å) | $V_g$ (kJ mol <sup>-1</sup> ) | $V_x$ (kJ mol <sup>-1</sup> ) | CCDC    |    |
|--------------|-----|---------|-----------|-----------|-----------|-------------------------------|-------------------------------|---------|----|
| TTT          | 1   | 8.21    | 2.05      | 5.66      | 0.43      | -7.58                         | -4.05/-3.46                   | 1025419 | 77 |
| TTTT         |     | 10.12   | 6.78      | 5.66      | 0.63      | -8.04                         | -4.06/-3.17                   | 1189330 | 78 |
| TTTTT        |     | 12.09   | 0.00      | 5.88      | 0.62      | -13.73                        | -4.26                         | 280212  | 79 |
| TTT-TTT      |     | 15.85   | 0.78      | 5.81      | 0.50      | -17.39                        | -5.51/-4.17                   | 121235  | 80 |
| T-TTT-T      |     | 15.79   | 0.00      | 5.96      | 0.16      | -19.62                        | -5.28/-0.52                   | 258755  | 81 |
| PTTTTTP      |     | 16.62   | 0.00      | 5.94      | 0.84      | -18.29                        | -4.22/-0.34                   | 630757  | 82 |
| PTPTP        |     | 13.13   | 5.20      | 5.86      | 0.83      | -16.50                        | -10.80/-3.60                  | 668464  | 83 |
| PTTPTP       |     | 16.97   | 0.58      | 6.09      | 0.87      | -24.36                        | -4.44/-3.80                   | 911947  | 84 |
| PPTPTPP      |     | 17.62   | 8.27      | 5.79      | 0.80      | -20.53                        | -18.30/-3.64                  | 980613  | 85 |
| PTT-TTP      |     | 16.58   | 5.07      | 5.85      | 0.70      | -22.96                        | -11.13/-3.59                  | 911203  | 86 |
| PTTT-TTTP    |     | 20.43   | 0.75      | 5.93      | 0.68      | -28.14                        | -4.58/-3.99                   | 916021  | 87 |
| PPSePP       |     | 13.33   | 7.48      | 5.16      | 1.60      | -15.11                        | -3.00                         | 2003835 | 88 |
| DBTTF        |     | 12.62   | 4.40      | 6.14      | 0.03      | -14.34                        | -7.58/-5.36                   | 1426210 | 89 |
| BTTTF        |     | 11.19   | 1.45      | 5.59      | 0.58      | -16.25                        | -3.01/-2.15                   | 1236389 | 90 |
| dithiapyrene | 2   | 8.21    | 6.08      | 4.96      | 2.13      | -10.71                        | -4.65                         | 1144889 | 91 |
| TO-OT        | 1   | 11.81   | 2.37      | 5.37      | 0.36      | -12.01                        | -2.55                         | 1180370 | 92 |

**Table S4** Structure parameters of representative  $\gamma$ -structures

| Compound        | $m$ | $X_g$ (Å) | $Y_g$ (Å) | $Z_g$ (Å) | $V_g$ (kJ mol <sup>-1</sup> ) | $X_s$ (Å) | $Y_s$ (Å) | $Z_s$ (Å) | $V_s$ (kJ mol <sup>-1</sup> ) | $V_x$ (kJ mol <sup>-1</sup> ) | CCDC    | Ref    |
|-----------------|-----|-----------|-----------|-----------|-------------------------------|-----------|-----------|-----------|-------------------------------|-------------------------------|---------|--------|
| coronene        | 3   | 4.32      | 0.36      | 7.19      | -11.56                        | 3.18      | 0.22      | 3.46      | -60.06                        | -12.77/-3.07                  | 1129883 | 93     |
| ovalene         | 4   | 5.45      | 1.26      | 8.31      | -12.94                        | 2.93      | 1.26      | 3.45      | -91.62                        | -19.21/-6.45                  | 1226289 | 94     |
| [18]annulene    | 3   | 0.37      | 3.10      | 7.17      | -12.39                        | 0.11      | 3.61      | 3.16      | -49.87                        | -10.75/-6.69                  | 1103169 | 95     |
| kekulene        | 5   | 3.28      | 5.98      | 9.34      | -18.10                        | 1.97      | 2.41      | 3.36      | -154.8                        | -19.13/-7.08                  | 1194780 | 96     |
| dithiaperylene  | 3   | 5.19      | 1.19      | 6.96      | -11.52                        | 2.72      | 0.11      | 3.42      | -62.03                        | -6.64/-5.23                   | 840103  | 97     |
| dibenzoperylene | 3   | 4.58      | 0.27      | 7.34      | -21.85                        | 2.27      | 3.27      | 3.40      | -63.63                        | -23.49/-5.80                  | 1137285 | 98     |
| benzopyrene     | 4   | 6.77      | 2.19      | 7.57      | -5.39                         | 2.81      | 0.69      | 3.50      | -50.11                        | -19.96/-4.11                  | 1112703 | 94,S11 |

**Table S5** Supplementary structure parameters of representative stacking structures

| Compound              | $L$ (Å) | $X_g$ (Å) | $Y_g$ (Å) | $Z_g$ (Å) | $V_Y$ (kJ mol <sup>-1</sup> ) | $X_g$ (Å) | $Y_g$ (Å) | $Z_g$ (Å) | $V_X$ (kJ mol <sup>-1</sup> ) | CCDC    |     |
|-----------------------|---------|-----------|-----------|-----------|-------------------------------|-----------|-----------|-----------|-------------------------------|---------|-----|
| Type I                |         |           |           |           |                               |           |           |           |                               |         |     |
| YZPP                  | 11.17   | 4.75      | 6.33      | 0.73      | -7.81                         | 12.07     | 1.87      | 2.26      | -6.29                         | 2103754 | 99  |
| PPQPP                 | 13.92   | 3.85      | 7.11      | 1.19      | -13.6                         | 13.99     | 2.80      | 0.46      | -2.68                         | 1230895 | 100 |
| PQPQP                 | 13.89   | 10.97     | 4.92      | 2.69      | -11.48                        | 8.50      | 7.07      | 0.69      | -8.50                         | 703585  | 101 |
| ZPQPZ                 | 13.55   | 8.02      | 6.19      | 0.52      | -9.65                         | 16.04     | 1.73      | 3.38      | -1.32                         | 829331  | 102 |
| quinacridone $\alpha$ | 13.91   | 0.11      | 6.88      | 0.49      | -5.83                         | 15.72     | 1.41      | 1.52      | -4.79                         | 620257  | 103 |
| Type IIa              |         |           |           |           |                               |           |           |           |                               |         |     |
| TPTPT                 | 12.70   | 0.00      | 7.18      | 0.68      | -11.55                        | 12.84     | 1.33      | 2.87      | -4.43                         | 254385  | 104 |
| PZQZP                 | 13.54   | 7.51      | 6.4       | 0.36      | -11.02                        | 8.97      | 5.51      | 0.06      | -7.53                         | 761663  | 102 |
| quinacridone $\beta$  | 13.80   | 0.50      | 6.91      | 0.47      | -8.22                         | 14.68     | 3.69      | 0.44      | -4.98                         | 620258  | 103 |
| Type IIb              |         |           |           |           |                               |           |           |           |                               |         |     |
| POOP                  | 10.45   | 0.06      | 6.3       | 1.39      | -12.21                        | 6.77      | 1.68      | 4.27      | -9.12                         | 1840406 | 105 |
| PPOPP                 | 12.09   | 4.41      | 7.81      | 1.34      | -5.28                         | 6.17      | 0.06      | 8.23      | -9.26                         | 898431  | 72  |
| PQP                   | 9.23    | 6.37      | 5.90      | 1.43      | -8.00                         | 9.67      | 0.29      | 2.71      | -3.34                         | 1103147 | 106 |
| ZAPPP                 | 13.61   | 7.37      | 5.63      | 1.10      | -8.04                         | 7.06      | 0.00      | 5.27      | -11.33                        | 870772  | 107 |
| PZPP                  | 11.21   | 3.23      | 5.98      | 1.84      | -13.24                        | 9.09      | 0.63      | 0.97      | -11.91                        | 2103753 | 99  |
| PSeP                  | 8.89    | 1.32      | 6.21      | 1.64      | -8.54                         | 6.85      | 2.87      | 3.05      | -6.74                         | 693675  | 108 |
| $\alpha$ -TTF         | 7.80    | 4.52      | 5.53      | 1.79      | -4.25                         | 9.07      | 0.10      | 2.06      | -5.84                         | 618630  | 109 |
| thienoisindigo        | 10.23   | 10.4      | 6.84      | 1.93      | -2.21                         | 7.77      | 1.36      | 4.14      | -8.80                         | 1524783 | 110 |
| Type III              |         |           |           |           |                               |           |           |           |                               |         |     |
| TTPTT                 | 12.31   | 2.62      | 5.99      | 6.19      | -7.69                         | 7.66      | 0.21      | 8.52      | -6.10                         | 1434834 | 111 |
| 4O                    | 14.37   |           |           |           |                               | 8.85      | 0.46      | 5.76      | -8.04                         | 750303  | 40  |
| (PAP)(PZP)            | 8.81    | 5.63      | 4.69      | 4.37      | -4.65                         | 6.03      | 0.91      | 3.45      | -10.73                        | 148756  | 55  |
| indigo                | 12.30   | 4.69      | 1.19      | 5.13      | -9.98                         | 4.69      | 1.19      | 5.13      | -9.98                         | 1180370 | 112 |
| quinacridone $\gamma$ | 13.82   | 13.38     | 3.49      | 4.00      | -3.69                         | 11.65     | 2.85      | 7.42      | -3.75                         | 620259  | 103 |

### Low-symmetry HB structures

Tetracene and pentacene have triclinic symmetry,<sup>32,33</sup> in which two crystallographically independent molecules are located on inversion centers. Accordingly, there are two independent g and s interactions (Table S6). The symmetry is lowered so as to realize nonzero  $X_s = 1.76$  and  $1.55$  Å in tetracene and  $1.64$  and  $1.45$  Å in pentacene. This happens so as to make the molecules tilted not only along the  $a$  axis but also along the  $b$  axis (Fig. S4(b)). However,  $Y_g, Z_g, Y_s,$  and  $Z_s$  are practically the same, and fulfill eqns (4) and (5). It is noteworthy that eqns (4) and (5) are satisfied only by placing molecules on inversion centers located at the center and corner of the lattice even without the glide symmetry. In the thin-film phase,<sup>S12-S14</sup> pentacene  $X_s$  becomes  $0.57$  and  $0.60$  Å (Table S6). The molecules are close to the substrate normal, and are advantageous to the charge transport. The thin-film phase is close to the ordinary HB structure. Even in the thin films,  $Y_g, Z_g, Y_s,$  and  $Z_s$  are practically the same as the other cases (Table S6).

The high-temperature phase of 4T has the ordinary  $P2_1/a$  symmetry,<sup>37</sup> but the low-temperature phase is doubled along the  $c$  axis and the molecules are located on a general position in keeping the monoclinic symmetry.<sup>S15</sup> This leads to two kinds of glide interactions (Table S6), and  $X_s$  changes from  $0.18$  to  $2.63$  Å. The nonzero  $X_s$  results in a more tilted structure characteristic of the low-temperature phase. 6T has a similar low-temperature phase, and the ordinary 8T phase corresponds to the low-temperature phase.<sup>39</sup> Although the manner of symmetry lowering is different, the less tilted high-temperature phase of 4T corresponds to the thin-film phase of pentacene.



**Table S6** Structure parameters of low symmetry HB structures

| Compound       | $a$ (Å) | $b$ (Å) | $\theta$ (°) | $W$<br>(Å) | $X_g$<br>(Å) | $Y_g$<br>(Å) | $Z_g$<br>(Å) | $V_g$ (kJ<br>mol <sup>-1</sup> ) | $X_s$<br>(Å) | $Y_s$<br>(Å) | $Z_s$<br>(Å) | $V_s$ (kJ<br>mol <sup>-1</sup> ) | CCDC    |     |
|----------------|---------|---------|--------------|------------|--------------|--------------|--------------|----------------------------------|--------------|--------------|--------------|----------------------------------|---------|-----|
| tetracene      | 7.98    | 6.14    | 50.89        | 4.97       | 0.26         | -1.06        | 4.80         | -33.33                           | 1.76         | 5.26         | 2.64         | -25.19                           | 1502159 | 32  |
| pentacene      | 8.058   | 6.119   | 53.39        | 4.69       | 0.38         | -0.92        | 4.78         | -38.07                           | 1.55         | 5.41         | 2.45         | -24.31                           | 619981  | 33  |
|                |         |         |              | 4.71       | 1.89         | -0.64        | 4.79         | -39.50                           | 1.45         | 5.31         | 2.66         | -27.54                           |         |     |
| pentacene TF   | 8.058   | 6.119   | 53.39        | 4.68       | 0.35         | -0.91        | 4.73         | -40.34                           | 0.57         | 5.28         | 2.70         | -27.73                           | 665900  | S14 |
|                |         |         |              | 4.68       | 0.20         | -0.89        | 4.73         | -40.46                           | 0.60         | 5.27         | 2.72         | -27.82                           |         |     |
| 4T (high $T$ ) | 8.936   | 5.7504  | 55.31        | 4.96       | 2.31         | -0.86        | 4.70         | -38.52                           | 0.18         | 5.09         | 2.67         | -28.71                           | 117770  | 37  |
| 4T (low $T$ )  | 7.7741  | 6.0348  | 62.39        | 4.78       | 1.14         | -0.27        | 4.74         | -37.04                           | 2.63         | 4.61         | 2.86         | -29.47                           | 1441400 | S15 |
|                |         |         |              |            | 1.31         | -0.32        | 4.77         | -37.28                           |              |              |              |                                  |         |     |
| 6T (high $T$ ) | 9.1404  | 5.6843  | 56.04        | 4.58       | 2.52         | -0.76        | 4.70         | -62.42                           | 0.08         | 5.02         | 2.67         | -45.10                           | 1309241 | 38  |
| 8T             | 7.842   | 6.002   | 63.28        | 4.77       | 1.16         | -0.26        | 4.77         | -78.78                           | 2.46         | 4.65         | 2.88         | -70.72                           | 1269355 | 39  |
|                |         |         |              |            | 1.26         | -0.28        | 4.79         | -80.17                           |              |              |              |                                  |         |     |
| TPT            | 7.803   | 5.842   | 54.3         | 4.75       | 0.29         | -0.69        | 4.72         | -21.81                           | 1.53         | 5.00         | 2.61         | -14.57                           | 295043  | 42  |
|                |         |         |              |            |              |              |              | -21.27                           | 1.50         | 5.01         | 2.60         | -16.86                           |         |     |
| TPPT           | 7.8065  | 5.8903  | 52.6         | 4.72       | 0.29         | -0.92        | 4.67         | -29.89                           | 1.49         | 5.10         | 2.55         | -23.04                           | 1899660 | 43  |
|                |         |         |              |            |              |              |              | -32.52                           | 1.44         | 5.13         | 2.52         | -22.09                           |         |     |
| TPPPT          | 7.772   | 5.9155  | 51.67        | 4.78       | 0.36         | -0.96        | 4.62         | -36.80                           | 1.50         | 5.14         | 2.52         | -29.61                           | 944975  | 44  |
|                |         |         |              |            |              |              |              | -36.34                           | 1.43         | 5.17         | 2.49         | -28.84                           |         |     |
| PAPP           | 7.8508  | 5.8275  | 54.93        | 4.81       | 0.35         | -0.78        | 4.63         | -31.74                           | 1.77         | 4.91         | 2.60         | -25.74                           | 696054  | 56  |
|                |         |         |              | 4.65       | 0.29         | -0.78        | 4.58         | -33.67                           | 1.57         | 5.00         | 2.54         | -28.56                           |         |     |
| PPAPP          | 8.853   | 5.7504  | 54.95        | 4.65       | 2.81         | 0.83         | 4.58         | -38.23                           | 0.69         | 5.07         | 2.63         | -33.26                           | 220864  | 57  |
|                |         |         |              | 4.64       | 2.05         | 0.865        | 4.65         | -38.15                           | 0.80         | 5.05         | -2.63        | -33.52                           |         |     |

(a) 3P

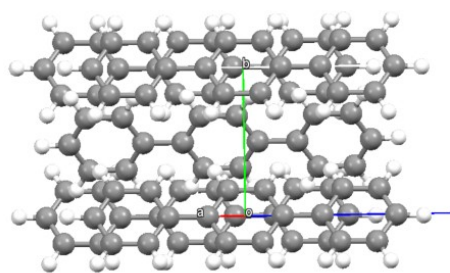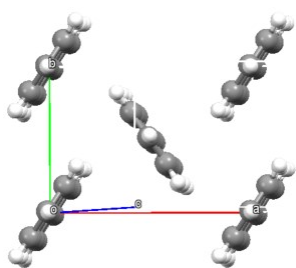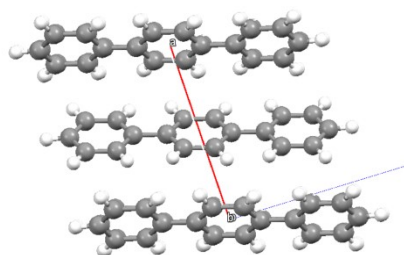

(b) Tetracene

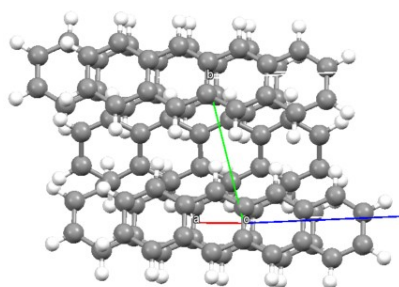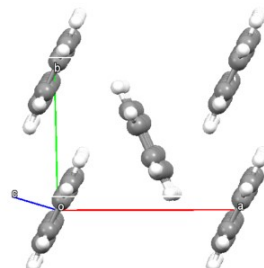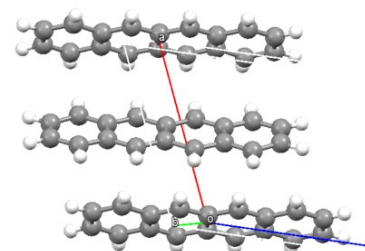

**Fig. S4** Crystal structures of (a) 3P and (b) tetracene.

### Lattice constants of HB structures

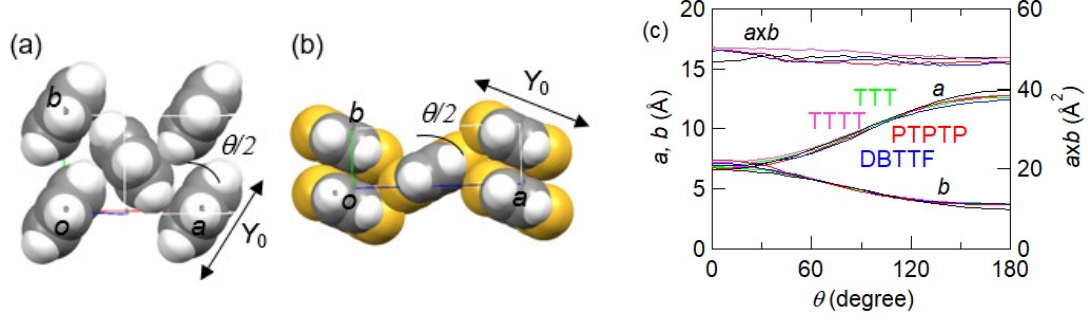

**Fig. S5** Molecular contacts in the (a) HB, and (b)  $\theta$ -structures. (c) Lattice constants  $a$  and  $b$  before (black) and after the optimization (colored) in  $\theta$ -structure materials.

A molecule is assumed to be a plate with a thickness  $Z_0$  and a width  $Y_0$ . Then,  $\theta$  dependence of the lattice constants is derived from the condition of molecular contacts shown in Fig. S5(a) and (b).

$$a = 2Z_0 / \cos \frac{\theta}{2} \quad (S5)$$

$$b = Y_0 \cos \frac{\theta}{2} \quad \text{for HB} \quad (S6)$$

$$a = 2Y_0 \sin \frac{\theta}{2} \quad (S7)$$

$$b = Z_0 / \sin \frac{\theta}{2} \quad \text{for the } \theta\text{- and } \gamma\text{-structures} \quad (S8)$$

Here  $Z_0 = 3.45 \text{ \AA}$  is the thickness of the molecule, and  $Y_0 = W + 1.9 \text{ \AA}$  is used by adding the van der Waals radius of hydrogen to  $W$ . We have tried various parameters, but after optimization, the lattice constants in Fig. 4(a) and S5(c) are well represented by cosine functions in eqns (6) and (7). In the above equations, we have to smoothly connect the HB and  $\theta$ -structure regions, but the cosine functions are smooth functions. It is noteworthy that the resulting  $a \times b$  is almost  $\theta$  independent (Fig. 4(a) and S5(c)), indicating that the lattice “volume” is constant due to the absence of redundant intermolecular space. In more than 1.5-leg compounds, this is not automatically satisfied, so

$$b = \frac{2Y_0Z_0}{a} \quad (S8)$$

is used instead of eqn (7). By this,  $Z_s$  is kept at  $Z_0$  down to  $60^\circ$  even in the  $\gamma$ -structures.

### Normalized potential curves

□□ Fig. S6(a) demonstrates that  $V_g$  and  $V_s$  are scaled by  $N_{\text{core}}$ ; intermolecular energy is in proportion to the molecular size. In particular,  $\theta$ -structure and HB materials attain excellent linearity. However,  $\gamma$ -structure materials are scattered because this category includes molecules with various shapes. There is a linear relation in the form of  $V = a N_{\text{core}} + b$ , where the  $a$  and  $b$  values are listed in Table S7. Nonzero  $b$  is associated with nonzero  $X_g$  and  $X_s$ .

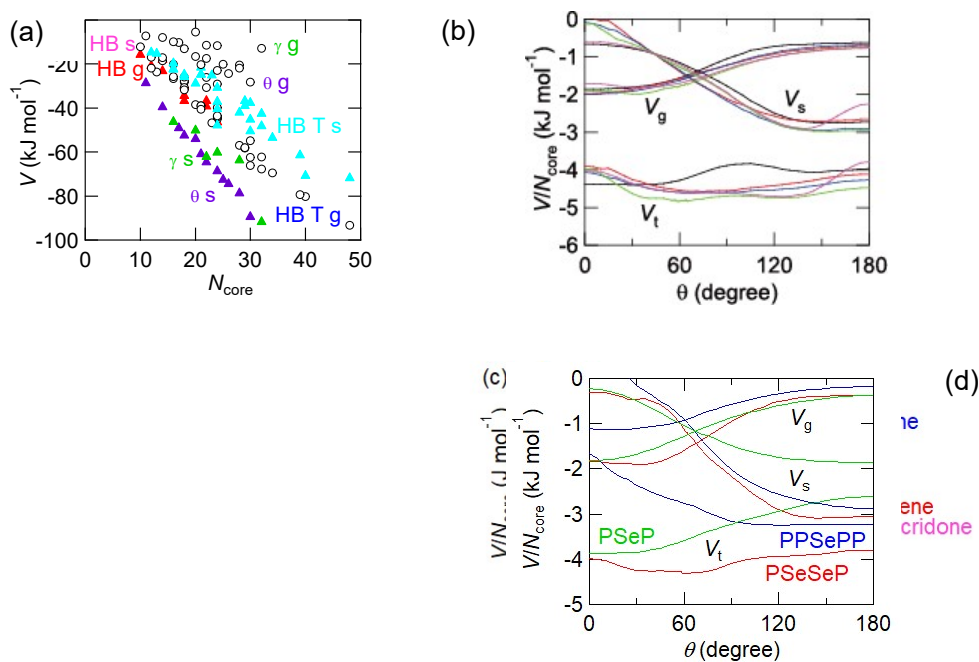

**Fig. S6** (a)  $V_g$  and  $V_s$  as a function of  $N_{\text{core}}$  for HB acenes and nP (red/pink), HB nT and thienoacenes (blue/pale blue),  $\theta$ -structures (purple), and  $\gamma$ -structures (green). (b) Potential curves of  $\theta$ -structures using  $X_g = 0 \text{ \AA}$ . (c) Potential curves of stacking and SHB materials. (d) Potential curves of Se-containing materials.

**Table S7** Linear parameters extracted from Fig. S6(a)

|          | g     |      | s     |       |
|----------|-------|------|-------|-------|
|          | a     | b    | a     | b     |
| HB       | -2.05 | 4.84 | -1.33 | -0.99 |
| $\theta$ | -1.10 | 6.17 | -3.03 | 3.66  |
| $\gamma$ | -0.56 | 1.20 | -2.56 | -1.69 |

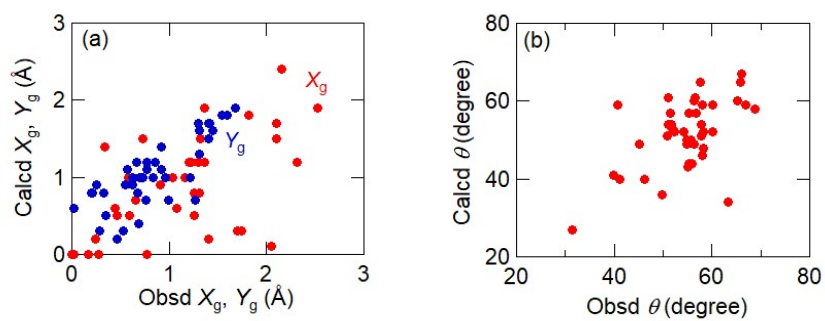

**Fig. S7** (a) Relation of calculated  $X_g$  and  $Y_g$  obtained from the potential minimum (Fig. 3(a) and (b)) and the observed values. (b) Relation of calculated  $\theta$  obtained from the potential minimum (Fig. 5) and the observed values.

### Rotation of the $\gamma$ -structures

In coronene, the original  $X$  axis (horizontal axis in Fig. S8(a)) has the zig-zag edge at the right and left edges. In analogy with the HB structures, the  $X$  axis defines  $L$ , and at  $\varphi \sim 0^\circ$  the upper and lower armchair edges form the vertical contact edges (Fig. 7(c)). In contrast,  $\varphi \sim 90^\circ$  (Fig. 7(b)) indicates that the zig-zag edge makes the contact edge. The latter is realized in the actual crystal. The potential is, however, a periodical function of  $60^\circ$ .

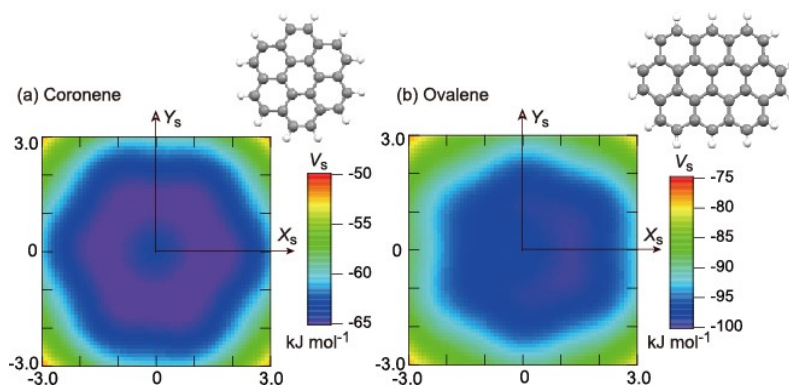

**Fig. S8** Intermolecular energy of (a) coronene stack, and (b) ovalene stack as a function of  $X_s$  and  $Y_s$  ( $\text{Å}$ ).

In Table S8, bold  $W$  or  $L$  is approximately perpendicular to the contact edge, which forms the zig-zag direction, and defines  $W^*$  used in eqn 6 to evaluate  $a$ . In some cases, molecular rotation  $\varphi$  within the molecular plane is necessary,

$$X_0^* = X_0 \cos^2 \phi + Y_0 \sin^2 \phi \quad (\text{S10})$$

$$Y_0^* = X_0 \sin^2 \phi + Y_0 \cos^2 \phi \quad (\text{S11})$$

where  $X_0$  and  $Y_0$  are  $L + 1.9 \text{ Å}$  and  $W + 1.9 \text{ Å}$ , respectively. Here,  $\varphi = 0^\circ$  is defined by the direction with largest  $L$ . After this rotation, positions of the glide and stack molecules are estimated by using eqns 4-7, and the contact patterns shown in Fig. 7 are obtained. Here,  $L$  and  $W$  are rotated similarly. Following this procedure, we can investigate hypothetical patterns as shown in Table S9 and Fig. S9.

**Table S8** Structure parameters of large-core  $\gamma$ -structures in the zig-zag direction.

| Compound        | $m$ | $W(\text{\AA})$ | $L(\text{\AA})$ | $W^*(\text{\AA})(\varphi)$ | $\theta(^{\circ})$ | Calcd $a(\text{\AA})$ | Obsd $a(\text{\AA})$ |
|-----------------|-----|-----------------|-----------------|----------------------------|--------------------|-----------------------|----------------------|
| coronene        | 3   | 9.23            | <b>9.28</b>     | 9.28                       | 94.77              | 16.52                 | 16.119               |
| ovalene         | 4   | 9.18            | 11.42           | 10.86 (120 $^{\circ}$ )    | 94.34              | 18.86                 | 19.47                |
| dithiaperylene  | 3   | 7.33            | <b>8.80</b>     | 8.80                       | 102.9              | 16.89                 | 15.436 ( $a+c$ )     |
| dibenzoperylene | 3   | 8.42            | 14.17           | 9.86 (150 $^{\circ}$ )     | 81.01              | 15.41                 | 16.98                |
| benzopyrene     | 4   | 6.91            | <b>11.19</b>    | 11.19                      | 106.9              | 21.56                 | 20.40                |

**Table S9** Comparative stability of two patterns of  $\gamma$ -structure coronene, and the HB and stacking  $\gamma$ -structures in PTPP/POOP and PAPP/PZPP.

| $\varphi$                    | Contact               | $W$             | $V_g(V_{\text{stat}})^e$<br>(kJ mol $^{-1}$ ) | $V_s^e$<br>(kJ mol $^{-1}$ ) | $V_{\text{side}}^e$<br>(kJ mol $^{-1}$ ) | $V_t^e$<br>(kJ mol $^{-1}$ ) |
|------------------------------|-----------------------|-----------------|-----------------------------------------------|------------------------------|------------------------------------------|------------------------------|
| coronene                     |                       |                 |                                               |                              |                                          |                              |
| 90 $^{\circ}$                | Zig-zag               | Armchair        | -12.35                                        | -58.01                       |                                          | <b>-82.80</b>                |
| 0 $^{\circ}$                 | Armchair              | Zig-zag         | -10.42                                        | -57.69                       |                                          | -78.57                       |
| $V(0^{\circ})-V(90^{\circ})$ |                       |                 | -1.93                                         | -0.32                        |                                          | -4.23                        |
|                              | Structure             | $W(\text{\AA})$ |                                               |                              |                                          |                              |
| PTTP (BTBT)                  | HB                    | 4.69            | -26.66                                        | -19.55                       | -5.90/-4.73                              | <b>-88.23</b>                |
|                              | Stacking <sup>a</sup> | 10.74           | -9.62                                         | -28.57                       | -9.19/-4.59                              | -70.79                       |
| POOP                         | HB <sup>b</sup>       | 4.67            | -22.55                                        | -19.32                       | -4.69/-3.14                              | -75.39                       |
|                              | Stacking              | 10.45           | -12.07                                        | -33.29                       | -8.97/-4.59                              | <b>-79.96</b>                |
| PAPP                         | HB                    |                 | -34.21/-30.97                                 | -28.56/-26.14                | -4.28/-3.91                              | <b>-100.72</b>               |
|                              |                       |                 | (-57.11/-60.17)                               | (-48.41/-46.80)              |                                          | <b>(-164.89)</b>             |
|                              | Stacking <sup>c</sup> |                 | -12.12                                        | -43.29/-28.09                | -11.92/-9.86                             | -81.71                       |
| PZPP                         | HB <sup>d</sup>       |                 | -29.08/-26.06                                 | -22.35                       | -5.14/-3.83                              | -86.46                       |
|                              |                       |                 | (-42.30/-45.60)                               | (-29.92/-28.81)              |                                          | (-117.27)                    |
|                              | Stacking              |                 | -11.91                                        | -43.14/-27.70                | -13.24/-12.52                            | <b>-85.00</b>                |
|                              |                       |                 | (-19.76/-10.34)                               | (-64.42/-41.31)              | (-23.18)                                 | <b>(-124.16)</b>             |

<sup>a</sup> Oxygen atoms in the stacking ( $\gamma$ -structure) POOP are replaced by sulfur atoms.  $V_t = 2V_g + V_s + 2$

$V_{\text{side}}$

<sup>b</sup> Sulfur atoms in the HB PTPP are replaced by oxygen atoms.  $V_t = 2V_g + V_s + \Sigma V_{\text{side}}$

<sup>c</sup> Hydrogen atoms are added to the stacking ( $\gamma$ -structure) PZPP. There are two crystallographically independent interactions similar to Table S6.

<sup>d</sup> Hydrogen atoms in the HB PAPP are removed. There are two crystallographically independent interactions similar to Table S6.  $V_t = \Sigma V_g + (1/2) \Sigma V_s$

<sup>e</sup> BLYP-D3/TZP on ADF in the parentheses.<sup>S16,S17</sup>

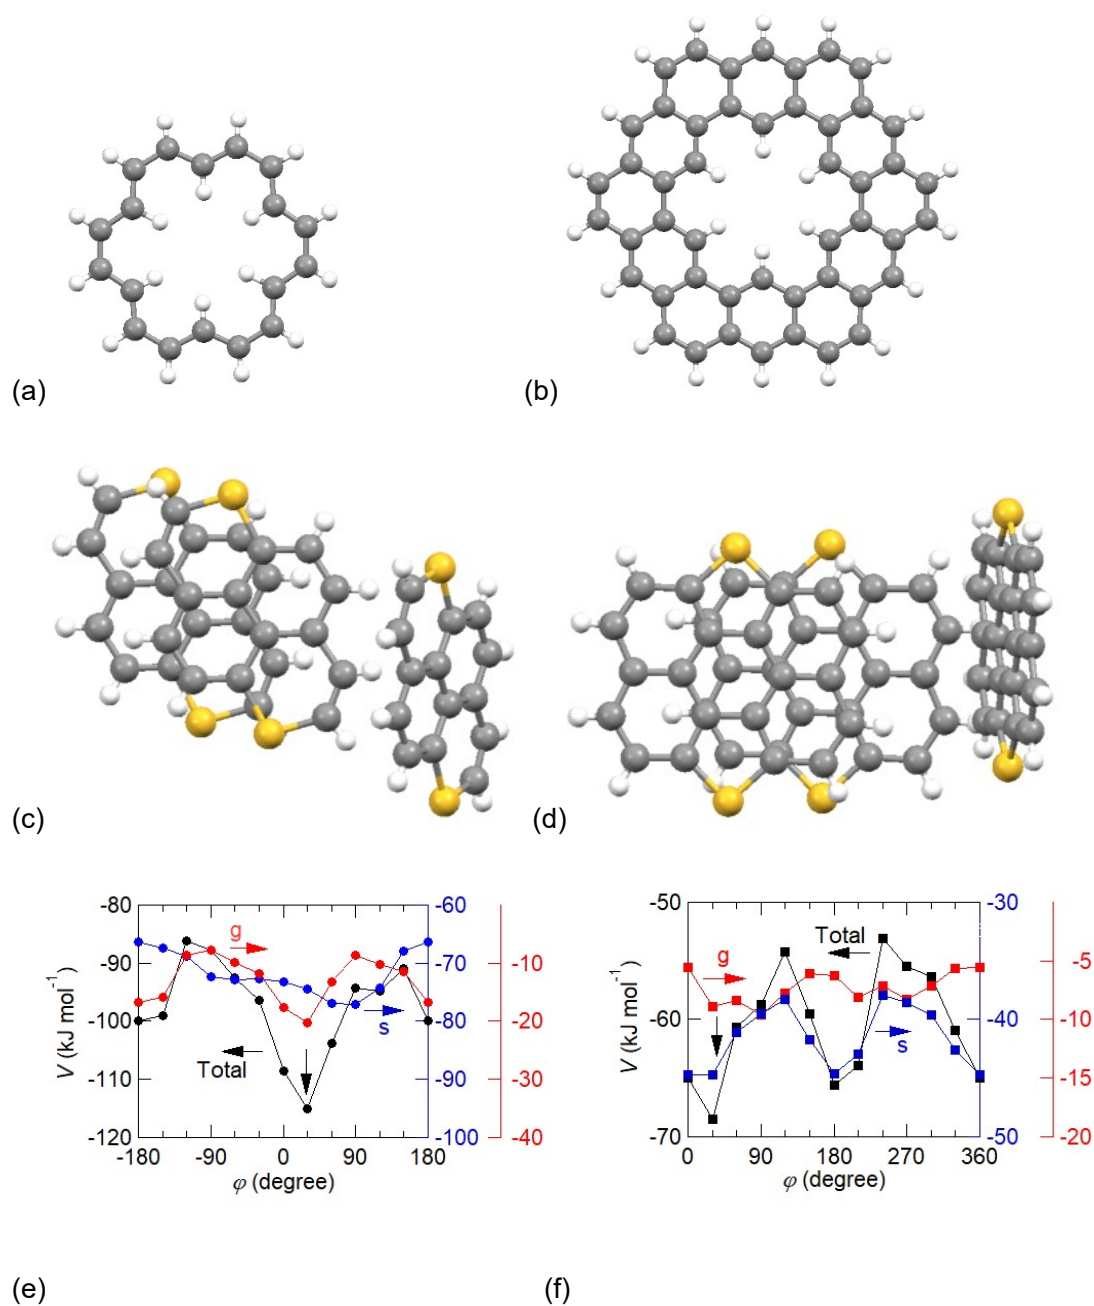

**Fig. S9** Molecular structures of (a) [18]annulene, and (b) kekulene. Contact patterns of (c) dithiapyrene, and (d) dithiaperylene. Total energy  $V_t = 2V_g + V_s$  of g-structure (e) dibenzoperylene, and (f) dithiapyrene molecules as a function the rotation angle  $\varphi$  within the molecular plane. The vertical arrows indicate the actual structures.



## Stacking structures

(a) YZPP (Type I)

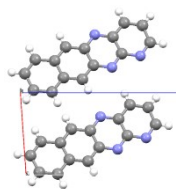

(b) PQQQP (Type I)

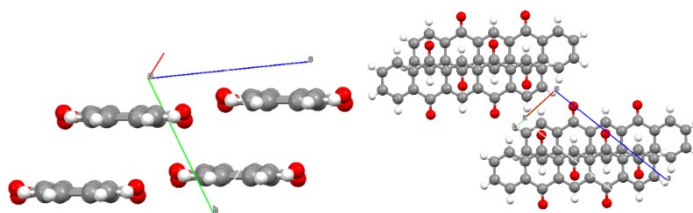

(c) Quinacridone  $\beta$  (Type IIa)

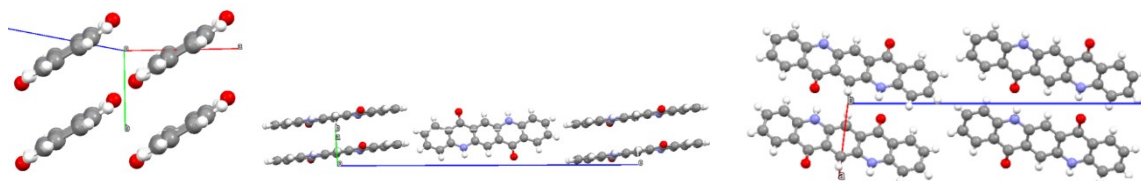

(d) POOP (Type IIb)

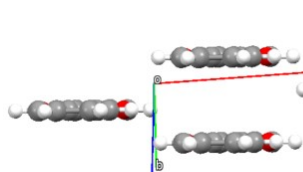

(e) PZPP (Type IIb)

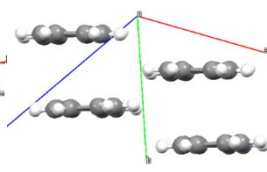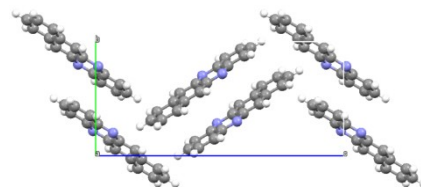

(f) TTPTT (Type III)

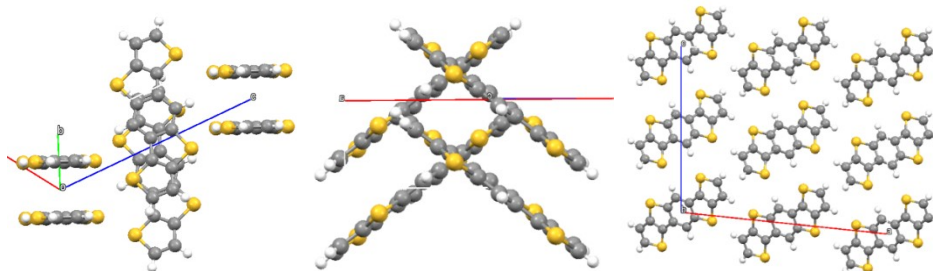

(g) (PAP)(PZP) (Type III)

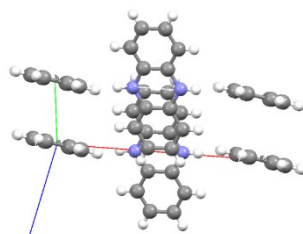

(h) Indigo (Type II)

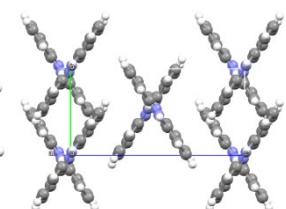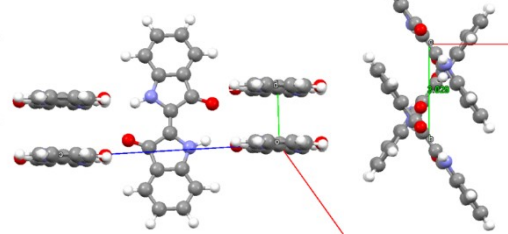

**Fig. S10** Representative stacking structures of (a) YZPP (Type I), (b) PQQQP (Type I), (c) quinacridone  $\beta$  (Type IIa), (d) POOP (Type IIb), (e) PZPP (Type IIb), (f) TTPTT (Type III), (g) (PAP)(PZP) (Type III), and (h) indigo (Type II).

## S1 interaction in SHB

Fig. S11 is the intermolecular energy for s1 in pyrene and perylene at  $Z_s = 3.45 \text{ \AA}$  calculated using 6-exp and BLYP-D3.<sup>S16,S17</sup> For pyrene in 6-exp,  $(X_s, Y_s) = (0.0, 1.7) (\text{\AA})$  ( $-33.8 \text{ kJ mol}^{-1}$ ) is slightly lower than the second minimum at  $(1.7, 0.0)$  ( $-32.9 \text{ kJ mol}^{-1}$ ). By BLYP-D3, however, the minimum appears at  $(1.8, 0.0)$  in agreement with the actual crystal structure  $(1.78, 0.10)$ . In perylene, both 6-exp  $(1.4, 1.3)$  and BLYP-D3  $(1.0, 1.5)$  reproduce the actual geometry  $(1.11, 1.36)$ . Accordingly, the s1 geometry in the SHB structures is regarded as the optimal stacking geometry.

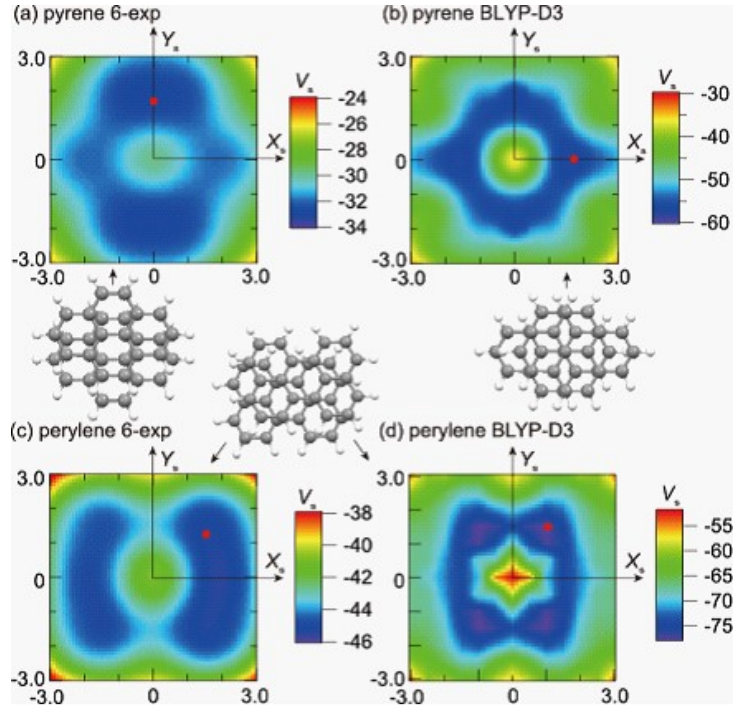

**Fig. S11** Intermolecular energy of pyrene dimer (s1) calculated by (a) 6-exp potential, and (b) BLYP-D3. Intermolecular energy of perylene dimer (s1) calculated by (c) 6-exp potential, and (d) BLYP-D3. The red circles indicate the calculated minima.

Geometry of s2 is obtained in analogy with eqn (4),

$$Y_{s2} = (b - 2y_0)\cos\frac{\theta}{2} - 2x_0\sin\frac{\theta}{2} \quad (\text{S12})$$

$$Z_{s2} = (b - 2y_0)\cos\frac{\theta}{2} + 2x_0\sin\frac{\theta}{2} \quad (\text{S13})$$

where  $x_0$  and  $y_0$  are the coordinates of the s1 molecule in the original rectangular coordinates. When  $\theta \sim 90^\circ$ , however,  $Z_{s2}$  is given by  $Z_0 = 3.4 \text{ \AA}$ .

### Contributions of dispersion and electrostatic contributions

When dispersion and electrostatic contributions are estimated independently for stacked molecules in Fig. 3(c), 3(d), S8(a), and S11(a), the dispersion term  $V_{\text{vdW}}$  (eqn (2)) has a minimum at  $(X_s, Y_s) = (0.0, 0.0)$ , whereas the electrostatic term  $V_{\text{stat}}$  (eqn (3)) has a repulsive (positive) peak at  $(0.0, 0.0)$  (Fig. S12 and S13). As a result, the minimum of the sum  $V_t$  appears 1.4-1.8 Å apart from the center. Usually, a staggered overlap is more stable than the eclipsed overlap, but in the present formulation this is derived from the competition of these two terms. In general,  $V_{\text{vdW}}$  is simply attractive for stacked molecules, while  $V_{\text{stat}}$  is repulsive because the carbon atoms have slight negative charges. For stacks, the electrostatic contribution makes the slightly slipped molecular arrangement most stable.

For molecules related to the glide plane in analogy with Fig. 3(a) and 3(b),  $V_{\text{vdW}}$  has a minimum around  $Y_g = 0.0$  Å, but  $V_{\text{stat}}$  prefers negative  $Y_g$  (Fig. S14), and the minimum of the total  $V_t$  appears around  $Y_g = -0.8$  Å. Here, the hydrogen atoms of the top molecule come to the center so that the C-H attraction is maximized. This is in agreement with the observed  $Y_g$  values in Table 1.

When independent terms are estimated for potential curves in Fig. 5,  $V_{\text{tvdW}}$  is a rather flat curve that does not have a clear minimum around  $\theta = 60^\circ$  (Fig. S15). However,  $V_{\text{sstat}}$  is definitely repulsive (positive) near the stacking structure at  $\theta = 180^\circ$  and slightly attractive (negative) around  $\theta = 60^\circ$ . As a result,  $V_t$  has a minimum around  $\theta = 60^\circ$ . In such thiophene containing molecules as TTT and TTTTT, the contribution of  $V_{\text{stat}}$  is small due to the absence of the peripheral hydrogen (Table S1). Accordingly, the  $\theta$ -structure becomes gradually stable. In pentacene and BTBT,  $V_{\text{tvdW}}$  has a minimum near  $\theta = 180^\circ$ , and if the atom charges are zero, the stacking or  $\theta$ -structure is most stable. The  $V_{\text{stat}}$  term represents preference to the T-type molecular arrangement. This is the reason that the stability of the T-type arrangement is usually explained in terms of the electrostatic attraction.<sup>7-9,24</sup>

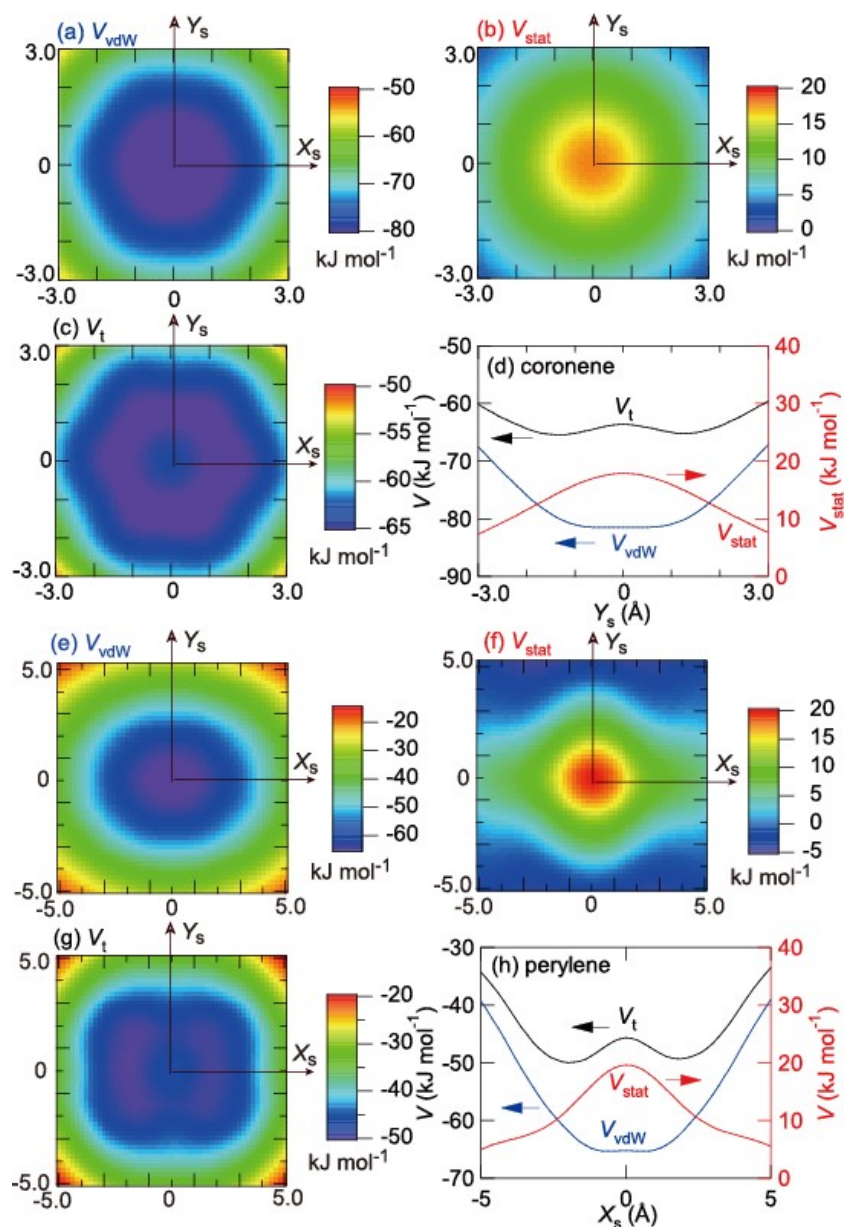

**Fig. S12** (a)  $V_{vdW}$ , (b)  $V_{stat}$ , and (c) the total energy  $V_t = V_{vdW} + V_{stat}$  of stacked coronene molecules at  $Z_s = 3.45$  Å, and (d) the intersect at  $X_s = 0.0$  Å. (e)  $V_{vdW}$ , (f)  $V_{stat}$ , and (g) the total energy  $V_t = V_{vdW} + V_{stat}$  of stacked perylene molecules at  $Z_s = 3.45$  Å, and (h) the intersect at  $X_s = 0.0$  Å.

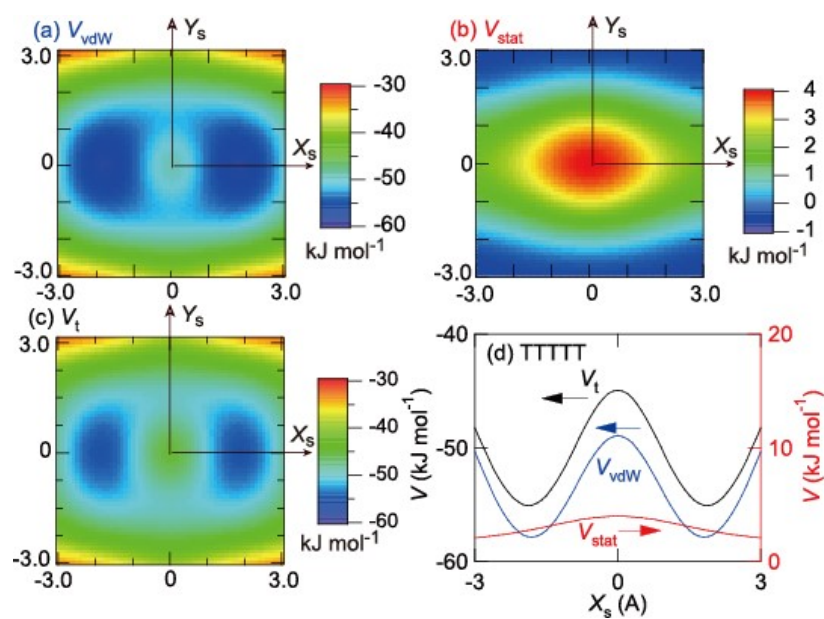

**Fig. S13** (a)  $V_{vdW}$ , (b)  $V_{stat}$ , and (c) the total energy  $V_t = V_{vdW} + V_{stat}$  of stacked TTTT molecules at  $Z_s = 3.45$  Å, and (d) the intersect at  $Y_s = 0.0$  Å.

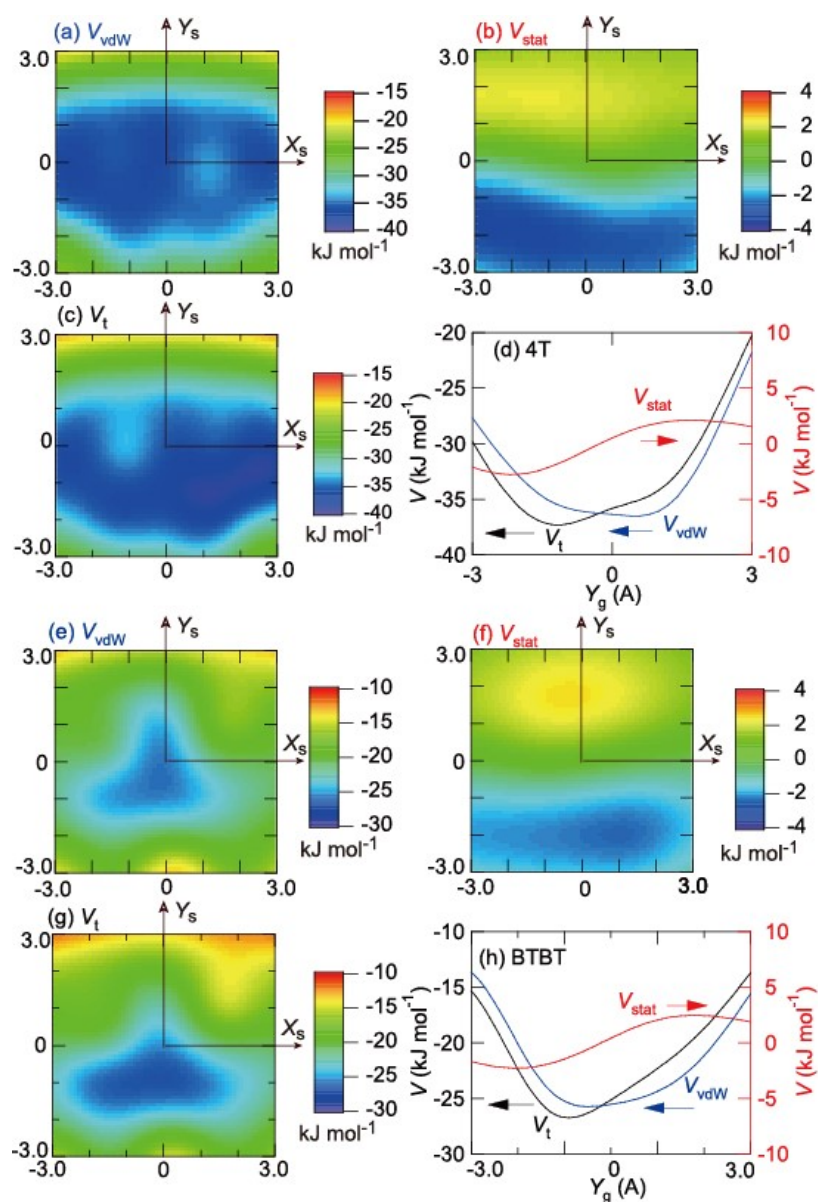

**Fig. S14** (a)  $V_{vdW}$ , (b)  $V_{stat}$ , and (c) the total energy  $V_t = V_{vdW} + V_{stat}$  of glide 4T molecules at  $Z_g = 4.70$  Å, and (d) the intersect at  $X_g = 0.0$  Å. (e)  $V_{vdW}$ , (f)  $V_{stat}$ , and (g) the total energy  $V_t = V_{vdW} + V_{stat}$  of glide BTBT molecules at  $Z_g = 4.88$  Å, and (h) the intersect at  $X_g = 0.0$  Å.



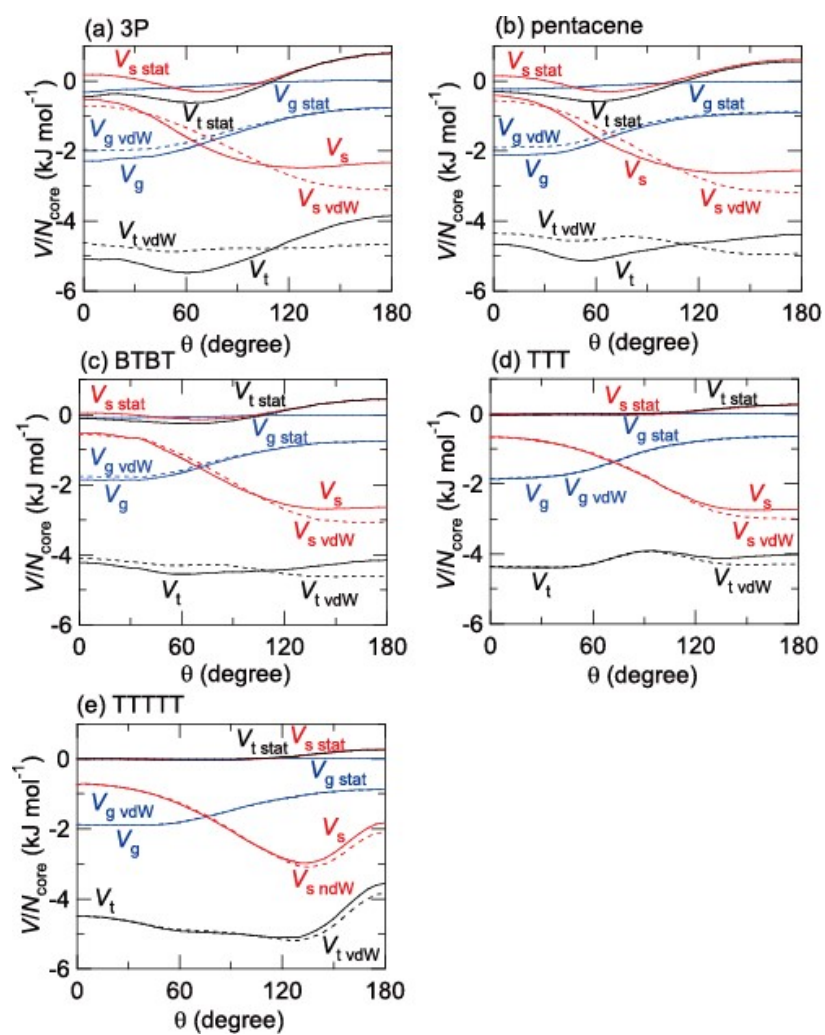

**Fig. S15** Independent potential curves for  $V_{vdW}$ ,  $V_{stat}$ , and  $V_t$  in (a) 3P, (b) pentacene, (c) BTBT, (d) TTT, and (e) TTTT.

## References

- S1 A. Gavezzotti, *Acc. Chem. Res.*, 1994, **27**, 309.
- S2 M. Mirsky, *Acta Crystallogr. A*, 1976, **32**, 199.
- S3 D. E. Williams and T. L. Starr, *Computers Chem.*, 1977, **1**, 173.
- S4 S. R. Cox, L.-Y. Hsu and D. E. Williams, *Acta Crystallogr. A*, 1981, **37**, 293.
- S5 D. E. Williams and S. R. Cox, *Acta Crystallogr., Sect. B: Struct. Crystallogr. Cryst. Chem.*, 1984, **40**, 404.
- S6 W. L. Jorgensen and J. Tirado-Rives, *J. Am. Chem. Soc.*, 1988, **110**, 1657.
- S7 J. R. Holden, Z. Du and H. L. Ammon, *J. Comp. Chem.*, 1993, **14**, 422.
- S8 W. D. Cornell, P. Cieplak, C. I. Bayly, I. R. Gould, K. M. Merz, Jr., D. M. Ferguson, D. C. Spellmeyer, T. Fox, J. W. Caldwell and P. A. Kollman, *J. Am. Chem. Soc.*, 1995, **117**, 5179.
- S9 The software is available from <http://www.op.titech.ac.jp/lab/mori/lib/exp.html> (accessed 2 October 2023).
- S10 <https://dasher.wustl.edu/tinker/distribution/params/> (accessed 2 October 2023).
- S11 J. Iball, S. N. Scrimgeour and D. W. Young, *Acta Crystallogr., Sect. B: Struct. Crystallogr. Cryst. Chem.*, 1976, **32**, 328.
- S12 C. C. Mattheus, G. A. de Wijs, R. A. de Groot and T. T. M. Palstra, *J. Am. Chem. Soc.*, 2003, **125**, 6323.
- S13 C. C. Mattheus, A. B. Dros, J. Baas, A. Meetsma, J. L. DeBoer and T. T. M. Palstra, *Acta Crystallogr., Sect. C.*, 2001, **57**, 939.
- S14 S. Schiefer, M. Huth, A. Dobrinevski and B. Nickel, *J. Am. Chem. Soc.*, 2007, **129**, 10316.
- S15 K. V. Zaitsev, A. V. Churakov and S. S. Karlov CCDC 1441400: *Exp. Cryst. Struct. Det.*, 2015.
- S16 S. Grimme, *WIREs Comput. Mol. Sci.*, 2011, **1**, 211.
- S17 ADF2017.109; Scientific Computing & Modeling (SCM), Theoretical Chemistry, Vrije Universiteit, Amsterdam, The Netherlands, <https://www.scm.com> (accessed 2 October 2023).
